# Supplementary material for: Metrological Reformation for Continuous Hand Gesture Recognition: Framework, Benchmarks, and Validation
Source: Research Square preprint supplement (doi:10.21203/rs.3.rs-8894382/v1), 2026-02-24
Supplement: Supplementary file 1 [file f6b1aa309697d01a9a3f99e4.docx]

**Table 1** Performance Rank Inversion: Jaccard Index vs. Event Detection Rate

| Benchmark | Method | Reported JI | Replicated JI | Event DR (τ=0.5) | JI Rank | Event Rank |
| --- | --- | --- | --- | --- | --- | --- |
| SHREC'22 | OO-dMVMT | 85% | 84.7% | 88.5% | 1 | 2 |
| SHREC'22 | Two-Model | 82% | 81.8% | 89.2% | 2 | 1 |
| SHREC'22 | Causal TCN | 80% | 79.6% | 85.3% | 3 | 3 |

**Table 2** EDR/FPR Sensitivity to Temporal Overlap Threshold τ

| Benchmark | Method | DR Range (τ 0.1→0.9) | FPR Range | ΔDR/Δτ (max) |
| --- | --- | --- | --- | --- |
| SHREC'22 | OO-dMVMT | 94.2%→61.2% | 28.3%→4.2% | -47.5%/0.1 |
| NVGesture | HSTV | 91.3%→52.8% | 31.7%→3.1% | -52.0%/0.1 |
| EgoGesture | TMMF | 89.7%→48.3% | 34.2%→5.8% | -55.1%/0.1 |
| ODHG | HSTV | 88.4%→45.2% | 29.8%→2.7% | -58.3%/0.1 |

**Table 3** Per-Subject EDR Heterogeneity for SOTA CHGR Methods

| Benchmark | Method | N Subjects | Mean DR | SD DR | Min DR | Max DR | % Users < 70% DR |
| --- | --- | --- | --- | --- | --- | --- | --- |
| NVGesture | HSTV | 20 | 81.5% | 11.3% | 58% | 94% | 25% |
| EgoGesture | TMMF | 50 | 80.3% | 12.1% | 51% | 96% | 30% |
| SHREC'22 | OO-dMVMT | 16 | 88.5% | 8.7% | 69% | 97% | 12.5% |
| ODHG | HSTV | 20 | 79.2% | 13.4% | 47% | 92% | 35% |

**Table 4** Kinematic Coverage of Non-Gesture Data in Legacy CHGR Benchmarks

| Benchmark | Non-Gesture Source | Kinematic Coverage |
| --- | --- | --- |
| ChAirGest | Rest positions | 2.3% |
| Montalbano T3 | Conversational gesticulation | 18.7% |
| ConGD | Inter-gesture intervals | 3.1% |
| NVGesture | Driving posture | 4.2% |
| EgoGesture | Rest, brief interaction | 2.8% |
| SHREC'19 | VR interface actions | 7.1% |
| IPN Hand | Rest, preparation | 3.4% |
| SHREC'22 | Rest, interface navigation | 8.2% |

**Table 5** Kinematic Coverage of Non-Gesture Data in Legacy CHGR Benchmarks

| Condition | Test FPR (original) | Test FPR (naturalistic) | Test DR (original) |
| --- | --- | --- | --- |
| Baseline | 12.1% | 31.4% | 88.5% |
| Simple augmentation | 11.8% | 28.7% | 88.9% |
| GeNGA augmentation | 6.4% | 12.3% | 90.2% |

**Table 6** GeNGA Ablation Study

| Ablation | FPR (naturalistic) | Δ from full |
| --- | --- | --- |
| Full GeNGA | 12.3% | — |
| - Conditional control | 18.7% | +52.0% |
| - DPP diversity | 16.2% | +31.7% |
| - Pre-training | 22.1% | +79.7% |
| - Fine-tuning | 15.8% | +28.5% |

**Table 7 Benchmark DDI Scores**

| Benchmark | THI | CI | IVI | NPI | ACI | **DDI** |
| --- | --- | --- | --- | --- | --- | --- |
| ChAirGest | 23 | 18 | 25 | 72 | 12 | **26.8** |
| Montalbano T3 | 67 | 72 | 68 | 41 | 58 | **64.8** |
| ConGD | 81 | 88 | 79 | 23 | 71 | **79.2** |
| NVGesture | 45 | 52 | 48 | 58 | 43 | **49.2** |
| EgoGesture | 58 | 63 | 61 | 52 | 67 | **61.4** |
| SHREC'19 | 18 | 12 | 22 | 68 | 8 | **22.4** |
| SHREC'22 | 63 | 58 | 62 | 47 | 73 | **61.8** |

**Table 8 SHREC'22 Re-Evaluation**

| Method | Reported JI | CGMF EDR (τ=0.43) | CGMF FPR (events/hr) | RL (median) | LDR |
| --- | --- | --- | --- | --- | --- |
| OO-dMVMT | 85% | 71.3% [68.2, 74.1] | 18.7 [15.2, 22.8] | 143ms | 0.81 |
| Two-Model | 82% | 73.1% [70.1, 75.8] | 21.2 [17.8, 25.1] | 97ms | 0.83 |
| Causal TCN | 80% | 68.2% [64.9, 71.3] | 16.3 [13.1, 19.8] | 89ms | 0.79 |

**Table 9 NVGesture Re-Evaluation**

| Method | Reported AUC | CGMF EDR (τ=0.43) | CGMF FPR (events/hr) | RL (median) | LDR |
| --- | --- | --- | --- | --- | --- |
| HSTV | 0.91 | 63.2% [58.7, 67.4] | 31.4 [26.8, 36.2] | 217ms | 0.71 |
| R3DCNN | 0.88 | 58.7% [54.1, 63.0] | 34.2 [29.5, 39.1] | 251ms | 0.67 |

**Table 10 EgoGesture Re-Evaluation**

| Method | Reported JI | CGMF EDR (τ=0.43) | CGMF FPR (events/hr) | RL (median) | LDR |
| --- | --- | --- | --- | --- | --- |
| TMMF | 80.3% | 59.8% [55.3, 64.1] | 28.7 [24.2, 33.6] | 189ms | 0.68 |
| C3D | 71.8% | 51.2% [46.8, 55.7] | 36.3 [31.4, 41.5] | 212ms | 0.59 |
